# Supplementary material
Source: Springer Nature journal article supplement (https://www.springermedizin.de/resource/supplementary/12888_2010_818_MOESM3_ESM.pdf/9478900)

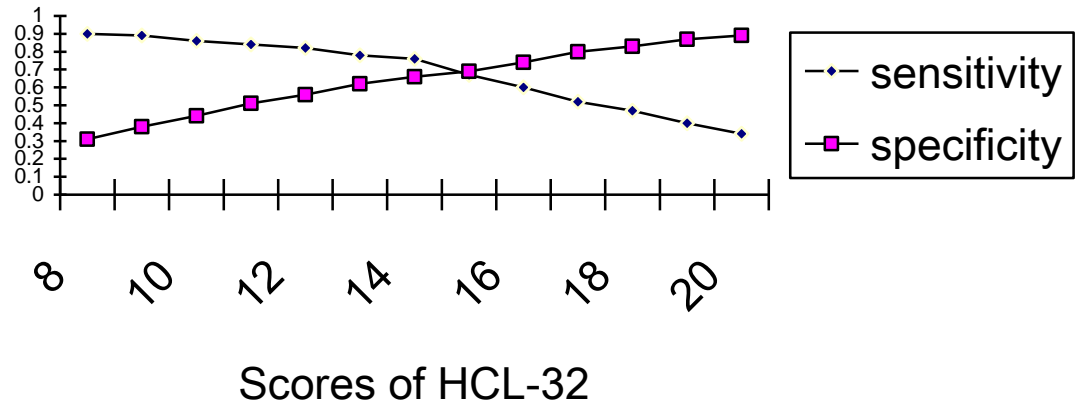

Supplement: MOESM3 [file 9478900]
